# Supplementary material for: Comparative effectiveness of interventional therapeutic modalities for unresectable hepatocellular carcinoma: A systematic review and network meta-analysis
Source: PubMed Central journal article supplement — Oncol Lett. 2022 Aug 31;24(4):366. doi: 10.3892/ol.2022.13486 (PMC9494298; doi:10.3892/ol.2022.13486), 2022-08-31

Figure S1. Quality assessment of included studies. (A) Overall assessment and (B) study-level risk of bias.

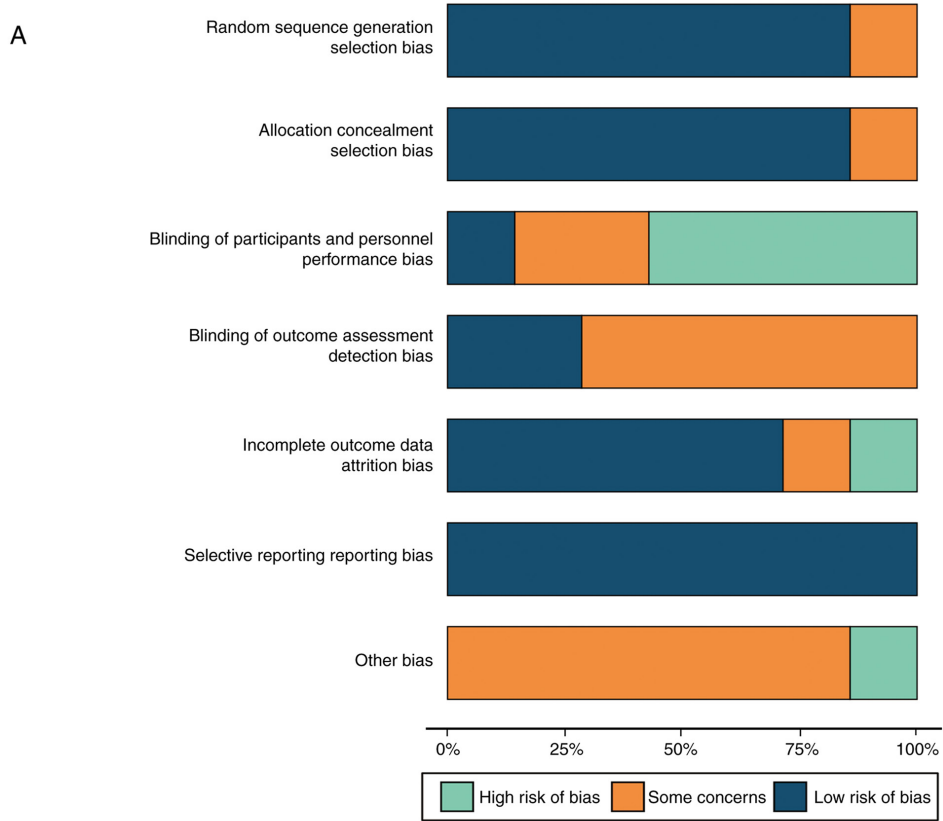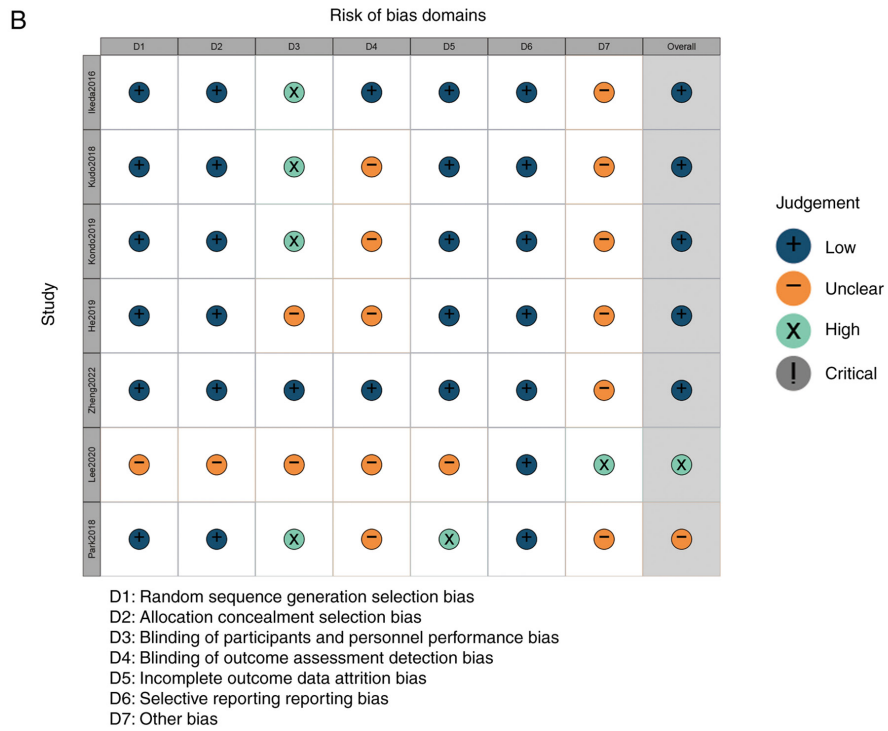

Supplement: Supplementary_Data1.pdf [file Supplementary_Data1.pdf]
