# Supplementary material for: Comparative effectiveness of interventional therapeutic modalities for unresectable hepatocellular carcinoma: A systematic review and network meta-analysis
Source: PubMed Central journal article supplement — Oncol Lett. 2022 Aug 31;24(4):366. doi: 10.3892/ol.2022.13486 (PMC9494298; doi:10.3892/ol.2022.13486), 2022-08-31
Supplement: Supplementary_Data2.pdf [file Supplementary_Data2.pdf]

| Table SI. Risk of bias assessment. |                                                           |           |                                                                                               |         |
|------------------------------------|-----------------------------------------------------------|-----------|-----------------------------------------------------------------------------------------------|---------|
| Author, year                       | Bias type                                                 | Judgement | Supporting evidence                                                                           | (Refs.) |
| Ikeda,2016                         | Random sequence generation (selection bias)               | Low       | Randomization was performed centrally using a minimization method with biased-coin assignment | (25)    |
|                                    | Allocation concealment (selection bias)                   | Low       | As above                                                                                      |         |
|                                    | Blinding of participants and personnel (performance bias) | High      | As an invasive intervention, HAIC cannot be performed without the patient being aware of it   |         |
|                                    | Blinding of outcome assessment (detection bias)           | Low       | The responses were evaluated centrally by three independent reviewers                         |         |
|                                    | Incomplete outcome data (attrition bias)                  | Low       | Missing data does not affect the analysis of the results                                      |         |
|                                    | Selective reporting (reporting bias)                      | Low       | All predetermined outcome indicators are reported as intended                                 |         |

|             |                                                           |         |                                                                                                                                                                  |      |
|-------------|-----------------------------------------------------------|---------|------------------------------------------------------------------------------------------------------------------------------------------------------------------|------|
|             | Other bias                                                | Unclear |                                                                                                                                                                  |      |
| Kudo,2018   | Random sequence generation (selection bias)               | Low     | Randomization was performed centrally via an interactive web response system involving a computer-generated sequence and electronic data capture system software | (24) |
|             | Allocation concealment (selection bias)                   | Low     | As above                                                                                                                                                         |      |
|             | Blinding of participants and personnel (performance bias) | High    | As an invasive intervention, HAIC cannot be performed without the patient being aware of it                                                                      |      |
|             | Blinding of outcome assessment (detection bias)           | Unclear | Not mentioned                                                                                                                                                    |      |
|             | Incomplete outcome data (attrition bias)                  | Low     | The investigators clearly described the reasons for disengagement from follow-up and compensated for the impact of missing results                               |      |
|             | Reporting bias                                            | Low     | All predetermined outcome indicators are reported as intended                                                                                                    |      |
|             | Other bias                                                | Unclear |                                                                                                                                                                  |      |
| Kondo, 2019 | Random sequence generation (selection bias)               | Low     | Random number was generated by SAS 9.3                                                                                                                           | (23) |

|          |                                                           |         |                                                                                                                                                               |      |
|----------|-----------------------------------------------------------|---------|---------------------------------------------------------------------------------------------------------------------------------------------------------------|------|
|          | Allocation concealment (selection bias)                   | Low     | Using minimization method with a random element using i) institute, ii) presence of portal vein tumor embolism, iii) presence of extrahepatic lesion          |      |
|          | Blinding of participants and personnel (performance bias) | High    | As an invasive intervention, HAIC cannot be performed without the patient being aware of it                                                                   |      |
|          | Blinding of outcome assessment (detection bias)           | Unclear | Not mentioned                                                                                                                                                 |      |
|          | Incomplete outcome data (attrition bias)                  | Low     | Missing data does not affect the analysis of the results                                                                                                      |      |
|          | Reporting bias                                            | Low     | All predetermined outcome indicators are reported as intended                                                                                                 |      |
|          | Other bias                                                | Unclear |                                                                                                                                                               |      |
| He, 2019 | Random sequence generation (selection bias)               | Low     | Randomization was performed centrally via a computer-generated randomization sequence and was stratified according to hospital and portal vein invasion grade | (22) |
|          | Allocation concealment (selection bias)                   | Low     | As above                                                                                                                                                      |      |
|          | Blinding of participants and                              | Unclear | Not mentioned                                                                                                                                                 |      |

|             |                                                                       |         |                                                                                                                                            |      |
|-------------|-----------------------------------------------------------------------|---------|--------------------------------------------------------------------------------------------------------------------------------------------|------|
|             | personnel<br>(performance<br>bias)                                    |         |                                                                                                                                            |      |
|             | Blinding of<br>outcome<br>assessment<br>(detection bias)              | Unclear | Not mentioned                                                                                                                              |      |
|             | Incomplete<br>outcome data<br>(attrition bias)                        | Low     | Missing data do not affect the analysis of the results and the investigator clearly describes the reasons for disengagement from follow-up |      |
|             | Reporting bias                                                        | Low     | All predetermined outcome indicators are reported as intended                                                                              |      |
|             | Other bias                                                            | Unclear |                                                                                                                                            |      |
| Zheng, 2022 | Random<br>sequence<br>generation<br>(selection bias)                  | Low     | Randomization was conducted using a random number table and was stratified according to portal vein invasion grade                         | (21) |
|             | Allocation<br>concealment<br>(selection bias)                         | Low     | As above                                                                                                                                   |      |
|             | Blinding of<br>participants and<br>personnel<br>(performance<br>bias) | Unclear | Not mentioned                                                                                                                              |      |
|             | Blinding of<br>outcome                                                | Low     | Assessed in consensus by radiologists who were blinded to the treatment protocol                                                           |      |

|           |                                                                       |         |                             |      |
|-----------|-----------------------------------------------------------------------|---------|-----------------------------|------|
|           | assessment<br>(detection bias)                                        |         |                             |      |
|           | Incomplete<br>outcome data<br>(attrition bias)                        | Low     | No personnel missing        |      |
|           | Reporting bias                                                        | Low     | Reported as intended ending |      |
|           | Other bias                                                            | Unclear |                             |      |
| Lee, 2020 | Random<br>sequence<br>generation<br>(selection bias)                  | Unclear | Not mentioned               | (27) |
|           | Allocation<br>concealment<br>(selection bias)                         | Unclear | Not mentioned               |      |
|           | Blinding of<br>participants and<br>personnel<br>(performance<br>bias) | Unclear | Not mentioned               |      |
|           | Blinding of<br>outcome<br>assessment<br>(detection bias)              | Unclear | Not mentioned               |      |
|           | Incomplete<br>outcome data<br>(attrition bias)                        | Low     | No personnel missing        |      |

|            |                                                           |         |                                                                                             |      |
|------------|-----------------------------------------------------------|---------|---------------------------------------------------------------------------------------------|------|
|            | Reporting bias                                            | Low     | All predetermined outcome indicators are reported as intended                               |      |
|            | Other bias                                                | High    | No follow-up data                                                                           |      |
| Park, 2018 | Random sequence generation (selection bias)               | Low     | Block randomization method                                                                  | (26) |
|            | Allocation concealment (selection bias)                   | Low     | As above                                                                                    |      |
|            | Blinding of participants and personnel (performance bias) | High    | As an invasive intervention, HAIC cannot be performed without the patient being aware of it |      |
|            | Blinding of outcome assessment (detection bias)           | Unclear | Not mentioned                                                                               |      |
|            | Incomplete outcome data (attrition bias)                  | High    | Missing data affects the analysis and the reason for the missing data is not described      |      |
|            | Reporting bias                                            | Low     | All predetermined outcome indicators are reported as intended                               |      |
|            | Other bias                                                | Unclear |                                                                                             |      |

HAIC, hepatic artery infusion chemotherapy.
